# Supplementary material
Source: publisher site journal article supplement (https://www.dovepress.com/article/272717)

**Supplementary Materials**

**Supplementary Figure Legends:**

**Figure S1. (A)** The correction betweenHOXA-AS2 expression level and liver cirrhosis. **(B)** Kaplan-Meier survival curve assessing the recurrence-free survival (RFS) of HCC patients with different HOXA-AS2 expression levels.

**Figure S2.** Heatmap of differentially expressed genes in HCC patients with High/Low HOXA-AS2 expression.

**Figure S3**. **(A)** The integrative SPADE clustering plot and t-SNE map of CD133 with high and low HOXA-AS2 expression. **(B)** The integrative SPADE clustering plot and t-SNE map of CD44 with high and low HOXA-AS2 expression. **(C)** The integrative SPADE clustering plot and t-SNE map of ALDH with high and low HOXA-AS2 expression.


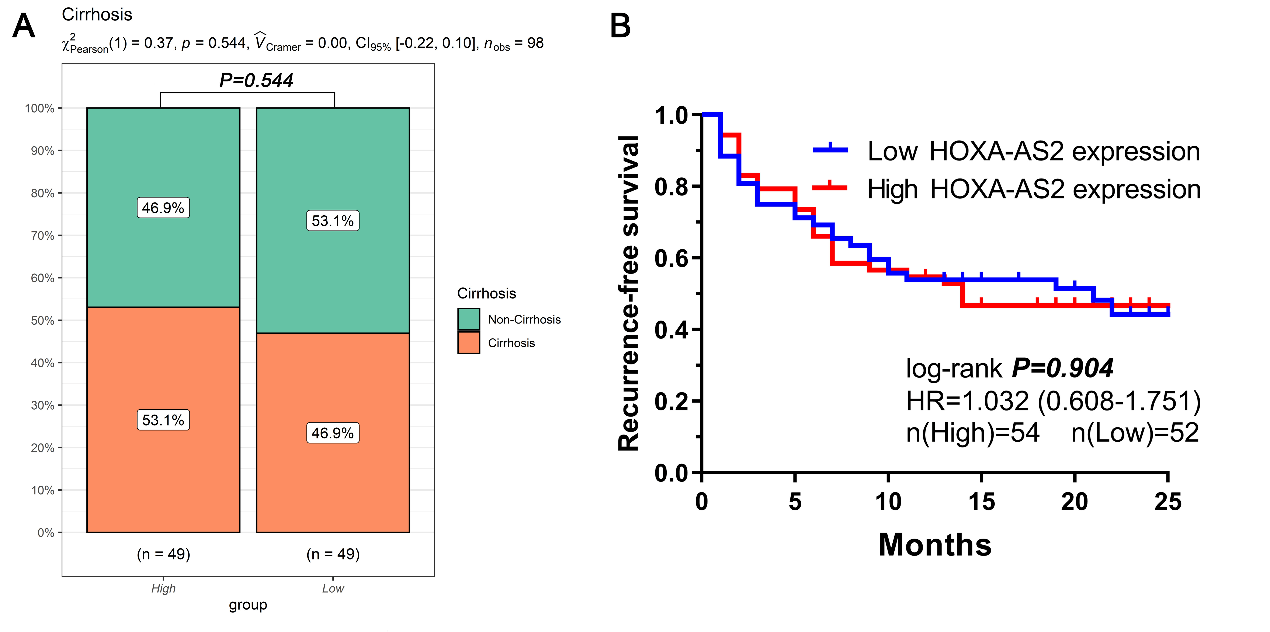
**Figure S1.**


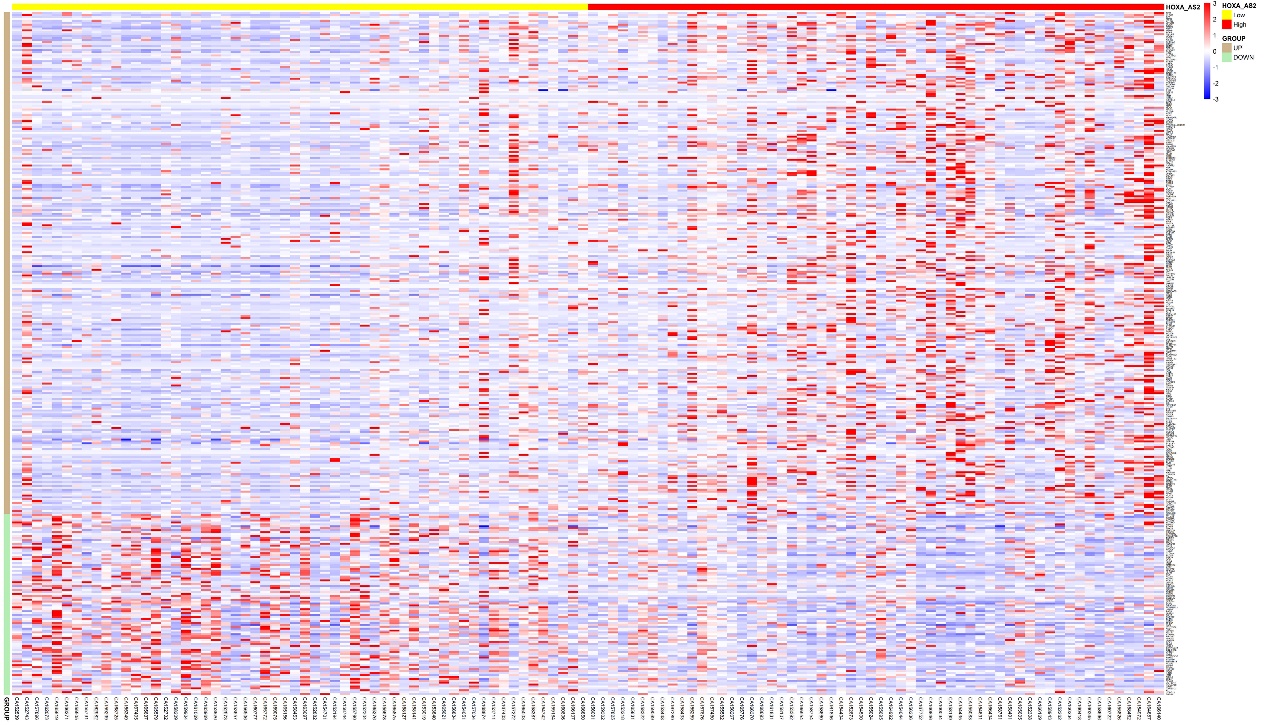
**Figure S2.**

**Figure S3.**


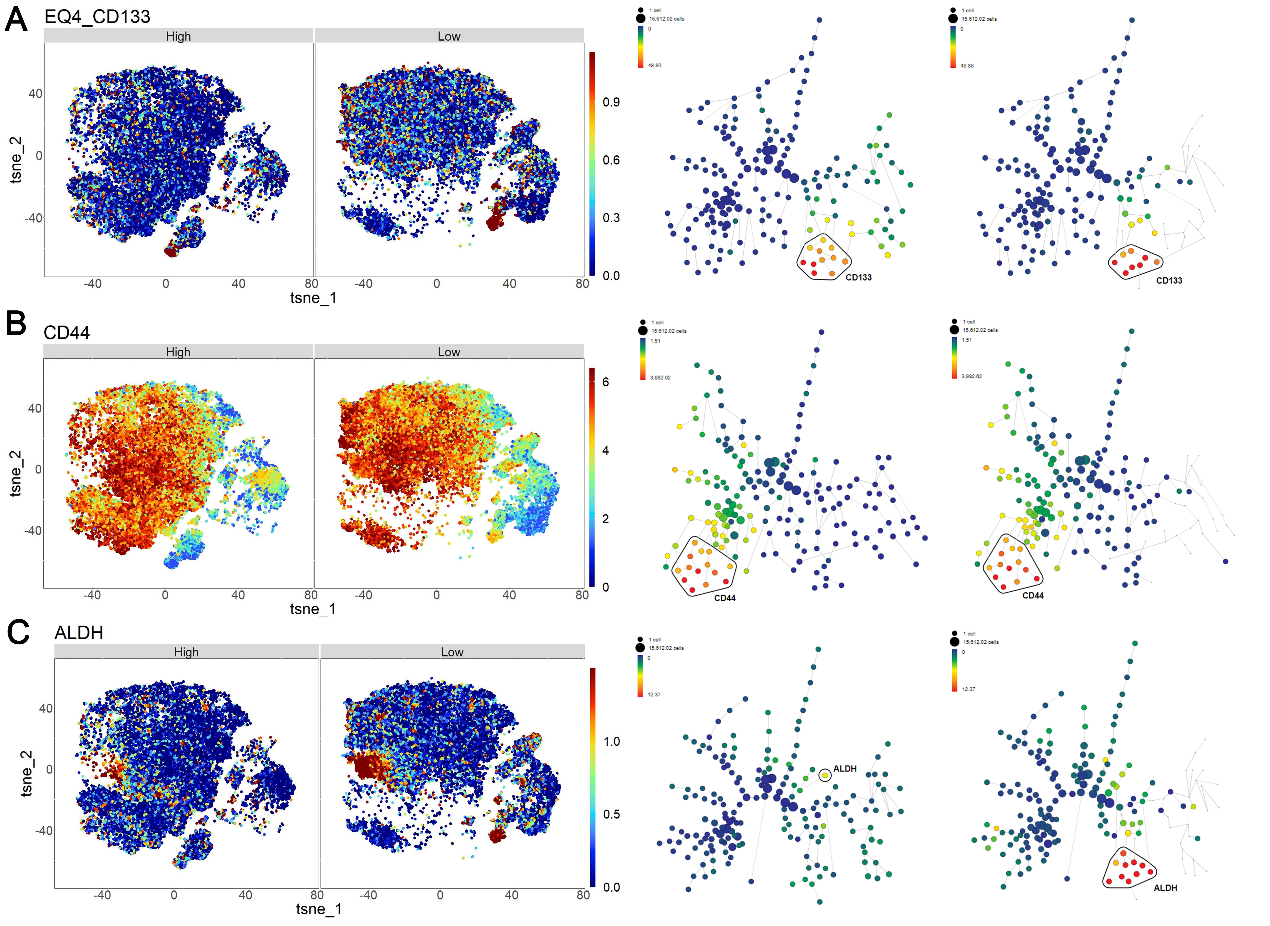

Supplement: Supplementary file 1 [file get_supplementary_file.php]
